# Supplementary material for: Silencing <italic>KIF14</italic> reverses acquired resistance to sorafenib in hepatocellular carcinoma
Source: publisher site journal article supplement (doi:10.18632/aging.104028), 2020-11-16
Supplement: Supplementary file [file aging-v12i22-104028-supplementary-material-SD1.pdf]

## SUPPLEMENTARY FIGURES

### GSE89410/GPL10739, selected sample

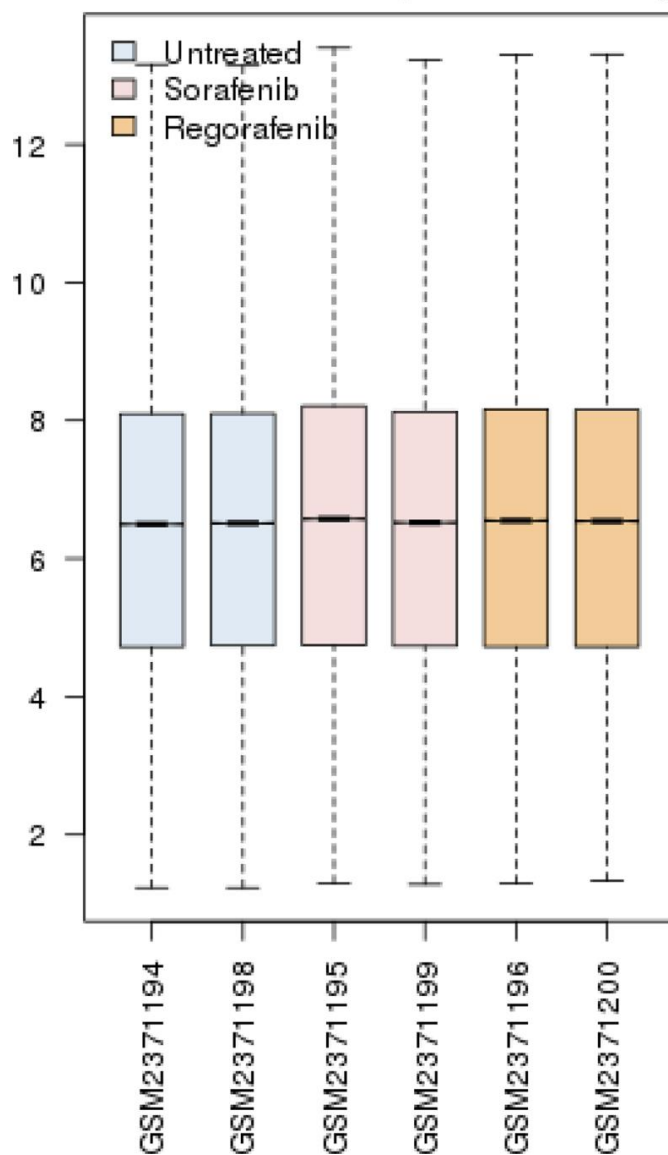

**Supplementary Figure 1. DEGs from the GEO database.** The gene expression profiles of GSE89410 were downloaded from the GEO database (<http://www.ncbi.nlm.nih.gov/geo/>), which consists of data from patient-derived pluripotent stem cells treated with 1  $\mu$ M sorafenib, 1  $\mu$ M regorafenib and no treatment controls. DEGs, differentially expressed genes; GEO, Gene Expression Omnibus.

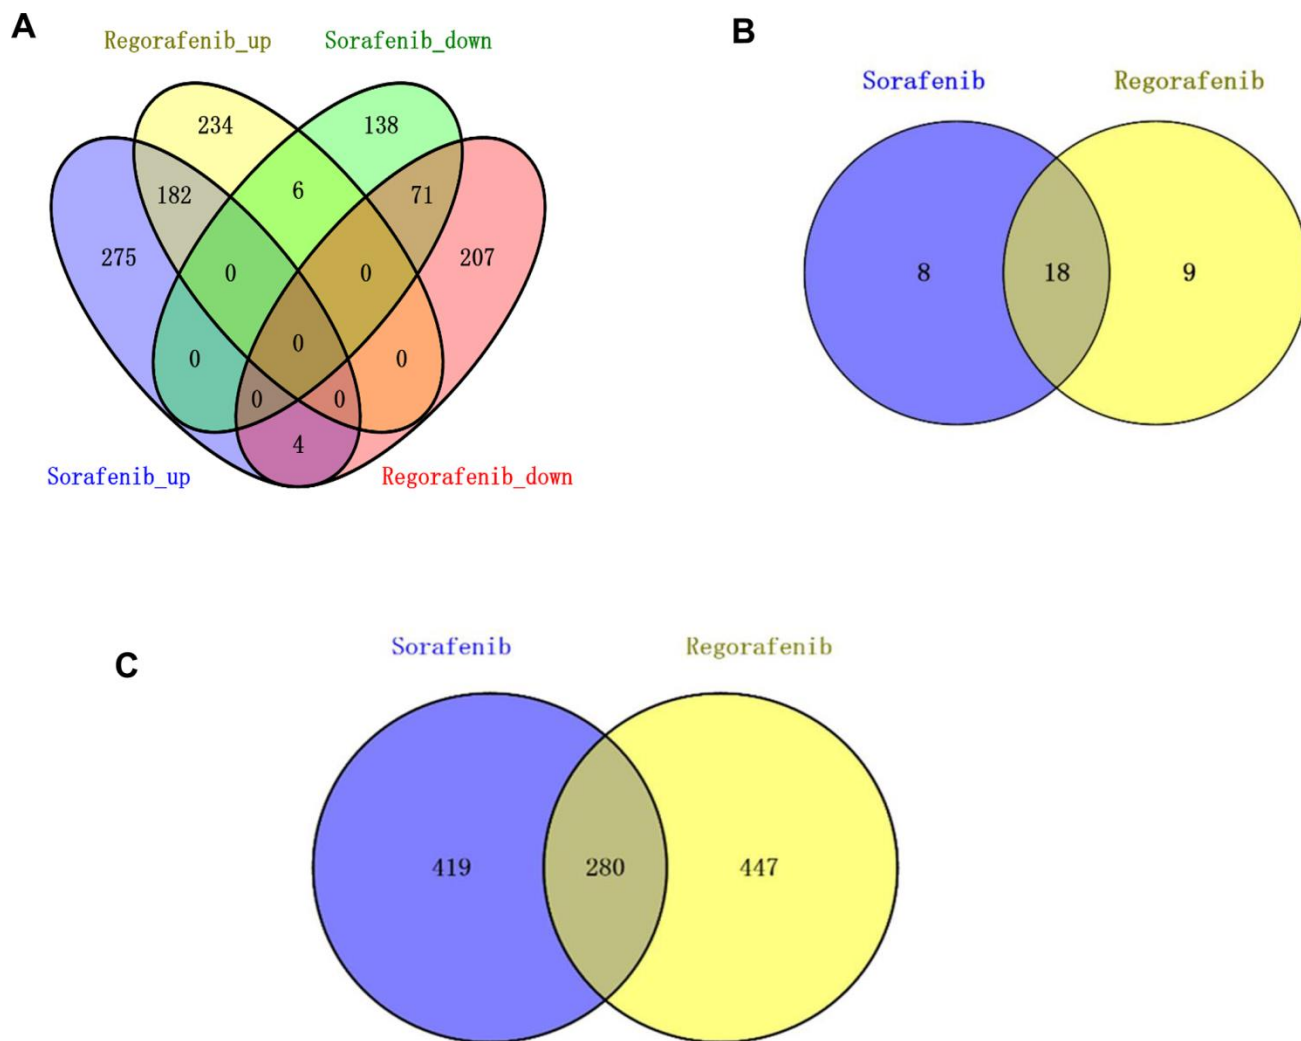

**Supplementary Figure 2. DEGs identified from the GEO and DrugBank databases.** (A) DEGs downloaded from the GSE89410 dataset. (B) Genes induced by sorafenib and regorafenib obtained from the DrugBank database (<https://www.drugbank.ca/>). (C) Genes induced by sorafenib and regorafenib from (A) and (B) integrated into a Venn diagram (online tool: <http://bioinformatics.psb.ugent.be/webtools/Venn/>). DEGs, differentially expressed genes; GEO, Gene Expression Omnibus.

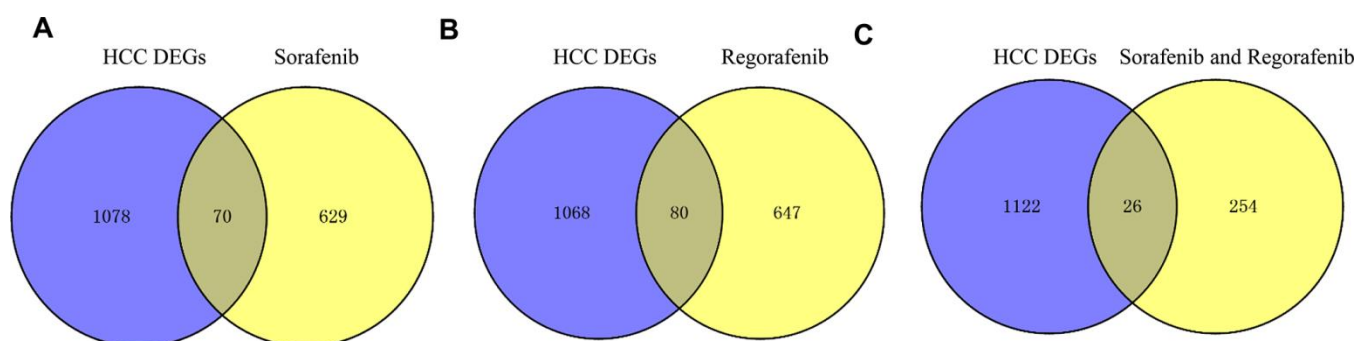

**Supplementary Figure 3. DEGs induced by sorafenib and regorafenib in HCC.** DEGs in HCC were downloaded from The Cancer Genome Atlas (<https://cancergenome.nih.gov/>). (A) DEGs in HCC and the sorafenib target genes identified in a Venn diagram. (B) DEGs in HCC and the regorafenib target genes were identified in a Venn diagram. (C) DEGs in HCC and the intersection of the sorafenib and regorafenib target genes identified in a Venn diagram. DEGs, differentially expressed genes; HCC, hepatocellular carcinoma.

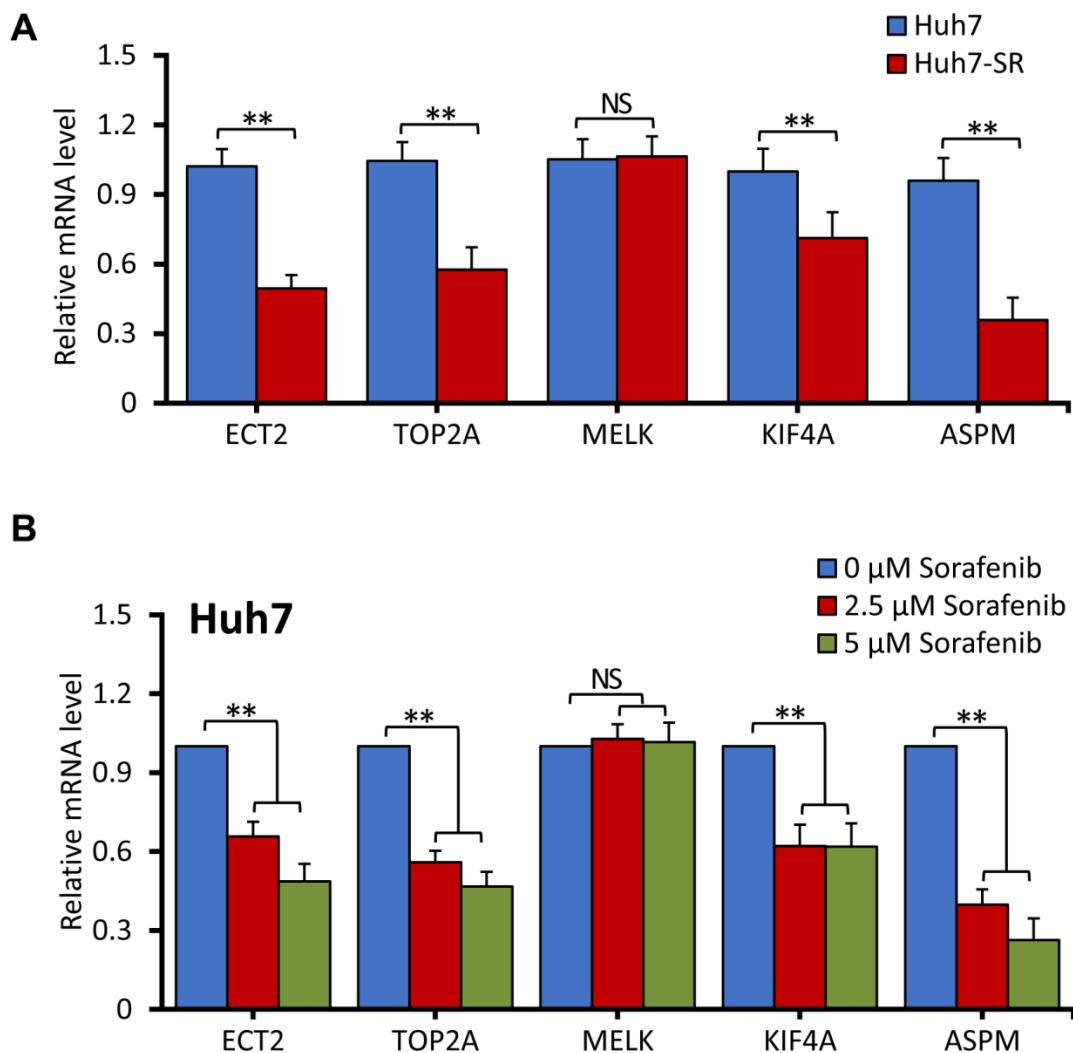

**Supplementary Figure 4. DEGs from bioinformatics analysis identified using qRT-PCR.** (A) Gene expression in sorafenib-resistant Huh7-SR and HepG2-SR cells and the corresponding parental cells detected with qRT-PCR. (B) Huh7 cells were incubated for 48 h with 0, 2.5 or 5 μM sorafenib. mRNA expression was measured by qRT-PCR and normalized to GAPDH. The level of mRNA from untreated cells was assigned a value of 1. Data represent three independent experiments. NS, not significant. “\*\*\*” indicates  $P < 0.001$ . DEGs, differentially expressed genes; qRT-PCR, quantitative reverse-transcription polymerase chain reaction.

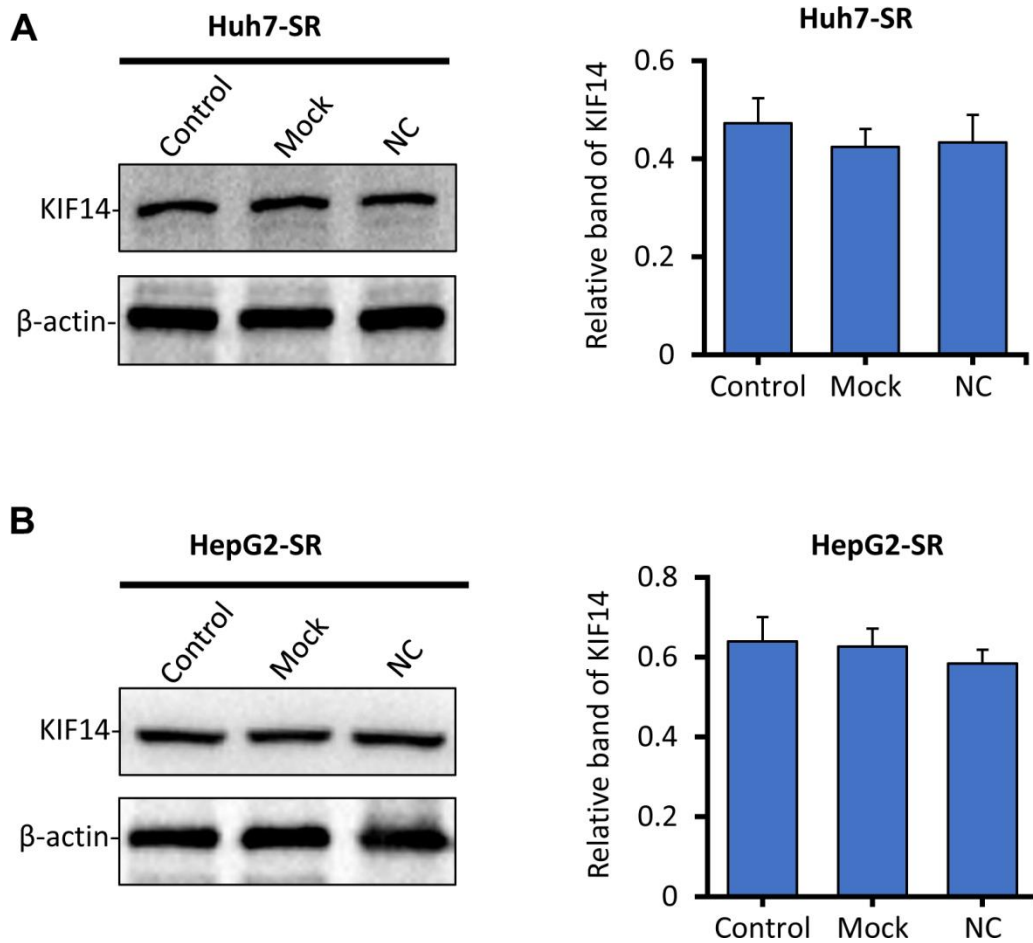

**Supplementary Figure 5. KIF14 protein expression profile is unaffected by NC.** Huh7-SR (A) and HepG2-SR (B) cells were transfected for 48 h with NC, after which western blot analysis was used to assess the protein expression profiles. The density of each band was normalized to that of  $\beta$ -actin. The transfection reagents served as a mock control. Corresponding untransfected cells served as a control. Data represent three independent experiments. NC, negative control.

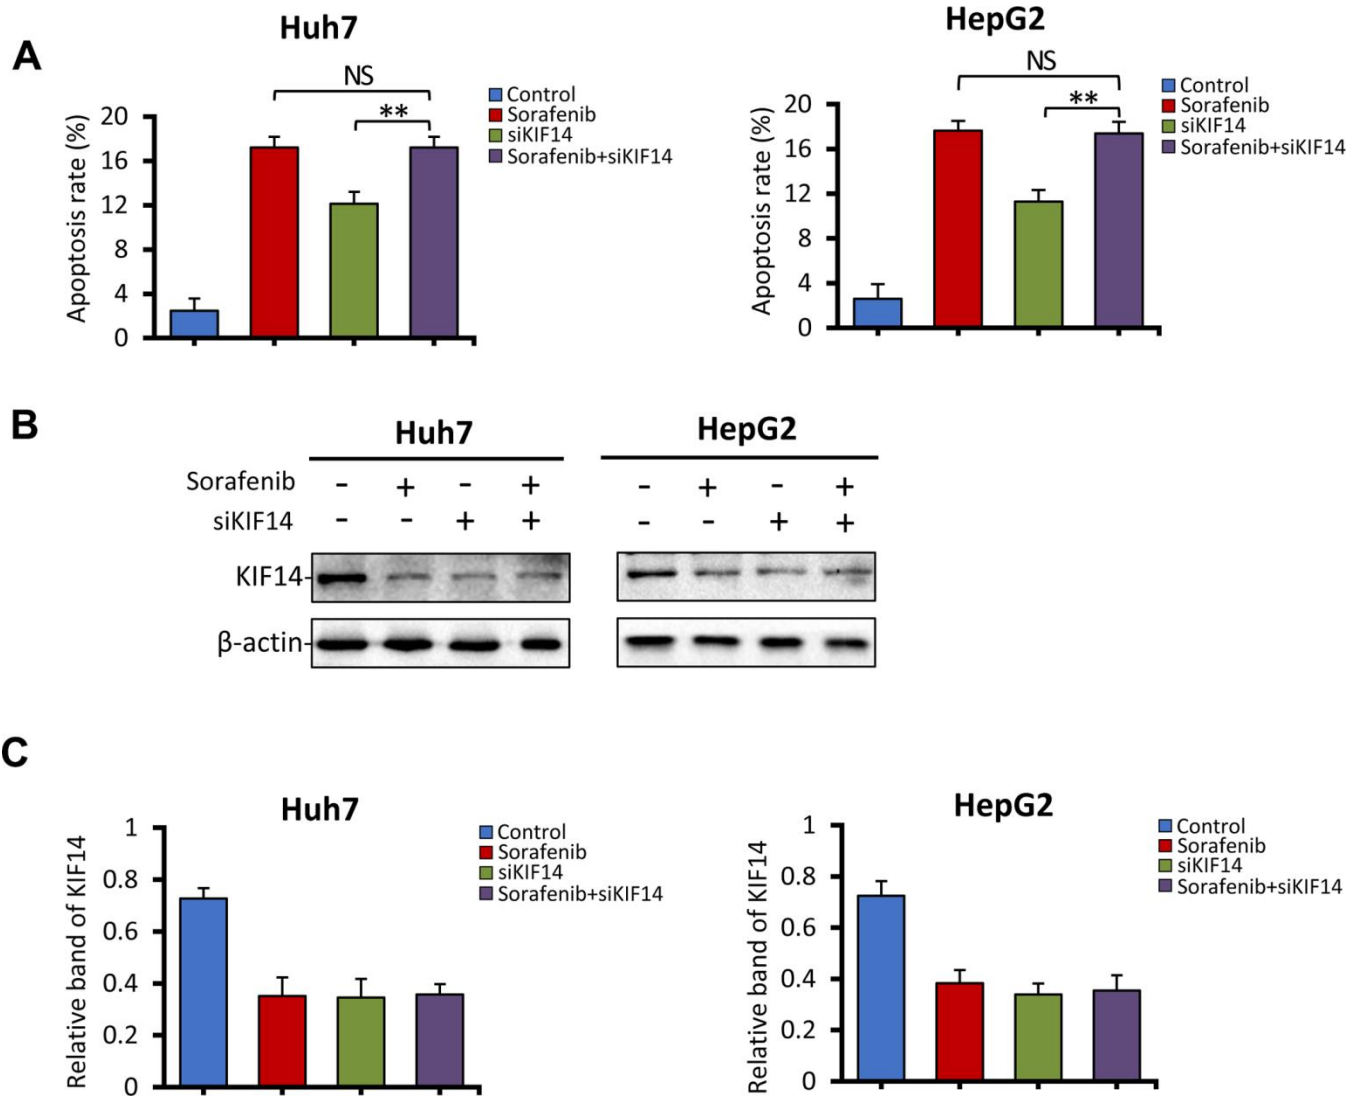

**Supplementary Figure 6. Silencing KIF14 does not have a synergistic effect with sorafenib in parental HCC cells.** (A) Huh7 and HepG2 cells were transfected for 24 h with control or siKIF14 and then incubated for 24 h with 0 or 5  $\mu$ M sorafenib. Cells were then analyzed cytometrically to detect apoptosis, and the rates of apoptosis were determined. (B, C) Cells from (A) were subjected to western blot analysis to assess protein expression profiles (B). The density of each band was normalized to that of  $\beta$ -actin (C). Data represent three independent experiments. NS, not significant. “\*\*\*” indicates  $P < 0.001$ .
